# Supplementary material for: Integrated analysis identifies TfR1 as a prognostic biomarker which correlates with immune infiltration in breast cancer
Source: publisher site journal article supplement (doi:10.18632/aging.203512), 2021-09-13
Supplement: Supplementary file [file aging-v13i17-203512-supplementary-material-SD1.pdf]

**SUPPLEMENTARY FIGURES**

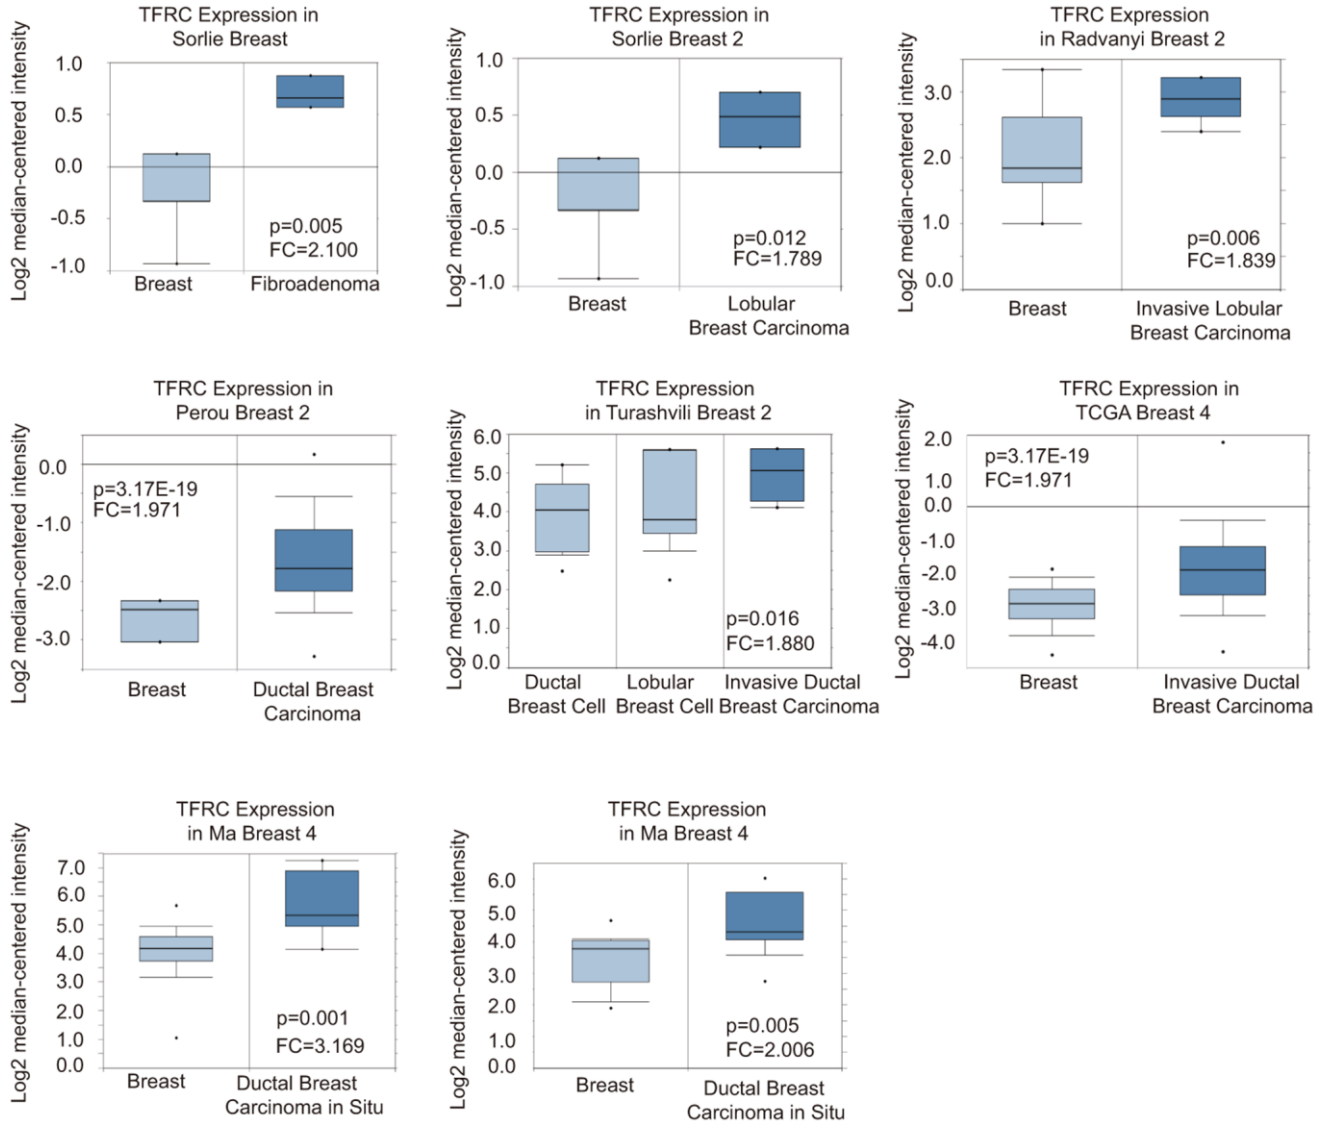

**Supplementary Figure 1. Box plots showing TfR1 expression in BC patients with different types and normal individuals through the Oncomine database.**

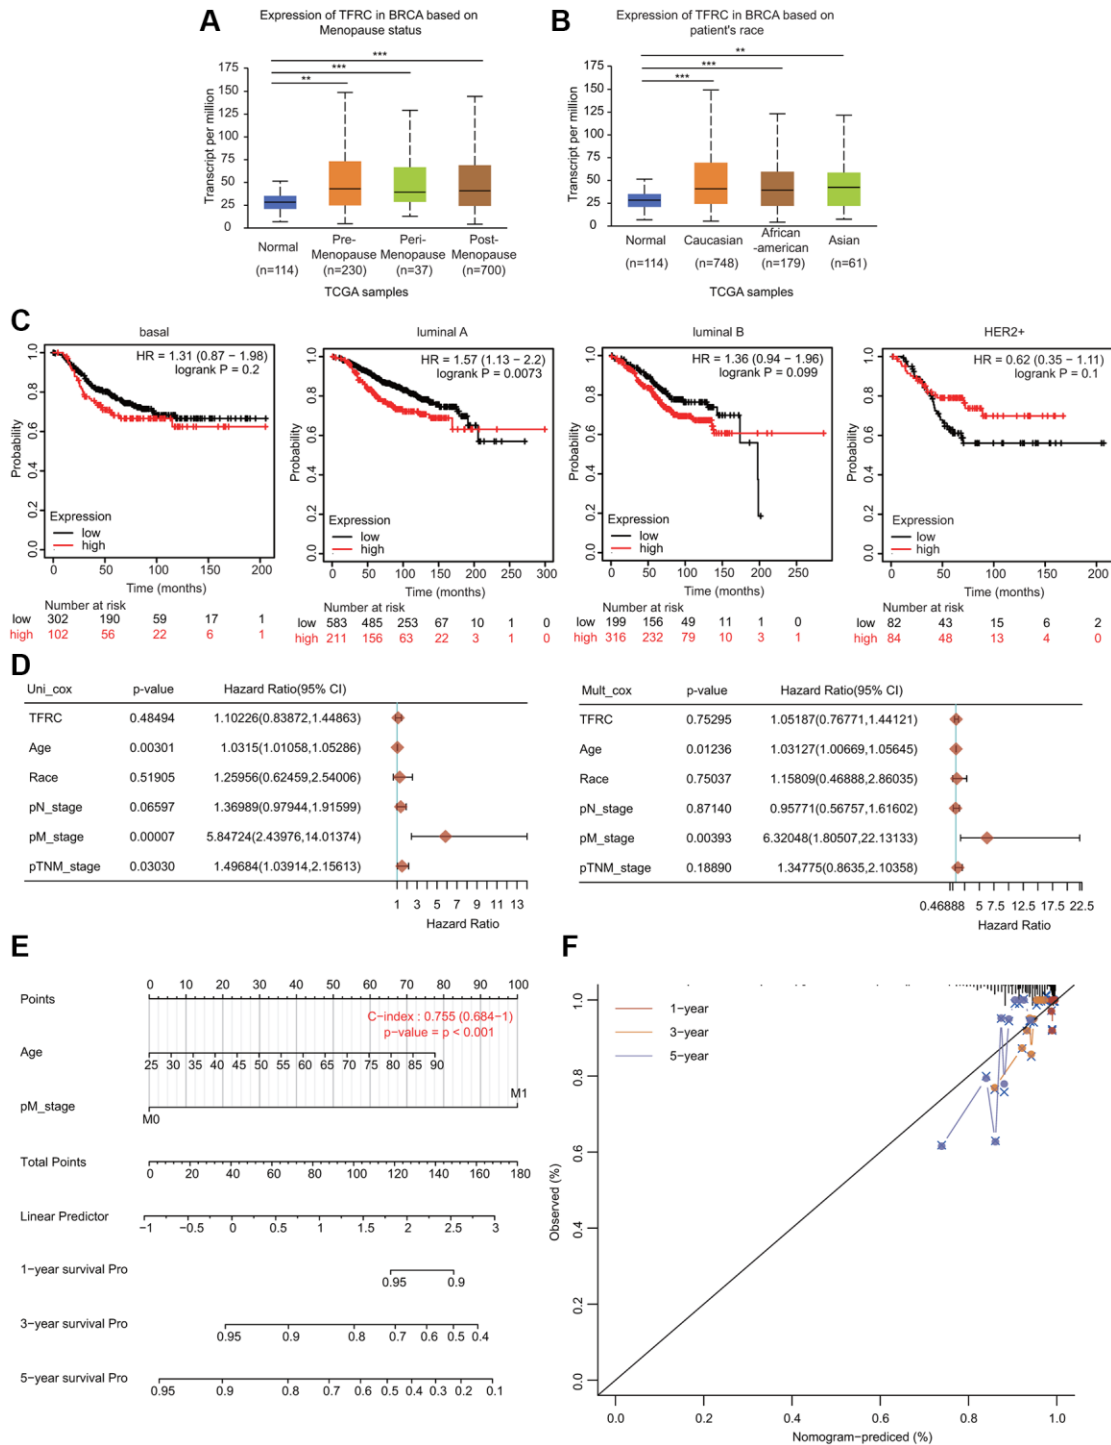

**Supplementary Figure 2. Relationships between the expression of Tfr1 and clinicopathological characteristics of BC patients.** Tfr1 expression was investigated in (A) different menopausal patients (normal individuals,  $n = 114$ ; premenopausal,  $n = 230$ ; perimenopausal,  $n = 37$ ; and postmenopausal,  $n = 700$ ) and (B) patients of different races (normal individuals,  $n = 114$ ; Asian,  $n = 61$ ; African-American,  $n = 179$ ; and Caucasian,  $n = 748$ ). (C) The OS of different subtypes of BC (basal, luminal A, luminal B and HER2+) was obtained from the KM plotter database. (D) Univariate and multivariate Cox regression analyses determined Tfr1 as an independent prognostic factor in the luminal A subtype of BC. (E) A prognostic nomogram integrating Tfr1 expression and clinicopathologic variables was constructed to estimate OS in luminal A subtype of BC. (F) Calibration plots to predict the OS of luminal A subtype patients at 1, 3, and 5 years. \* < 0.05, \*\* < 0.01, \*\*\* < 0.001.

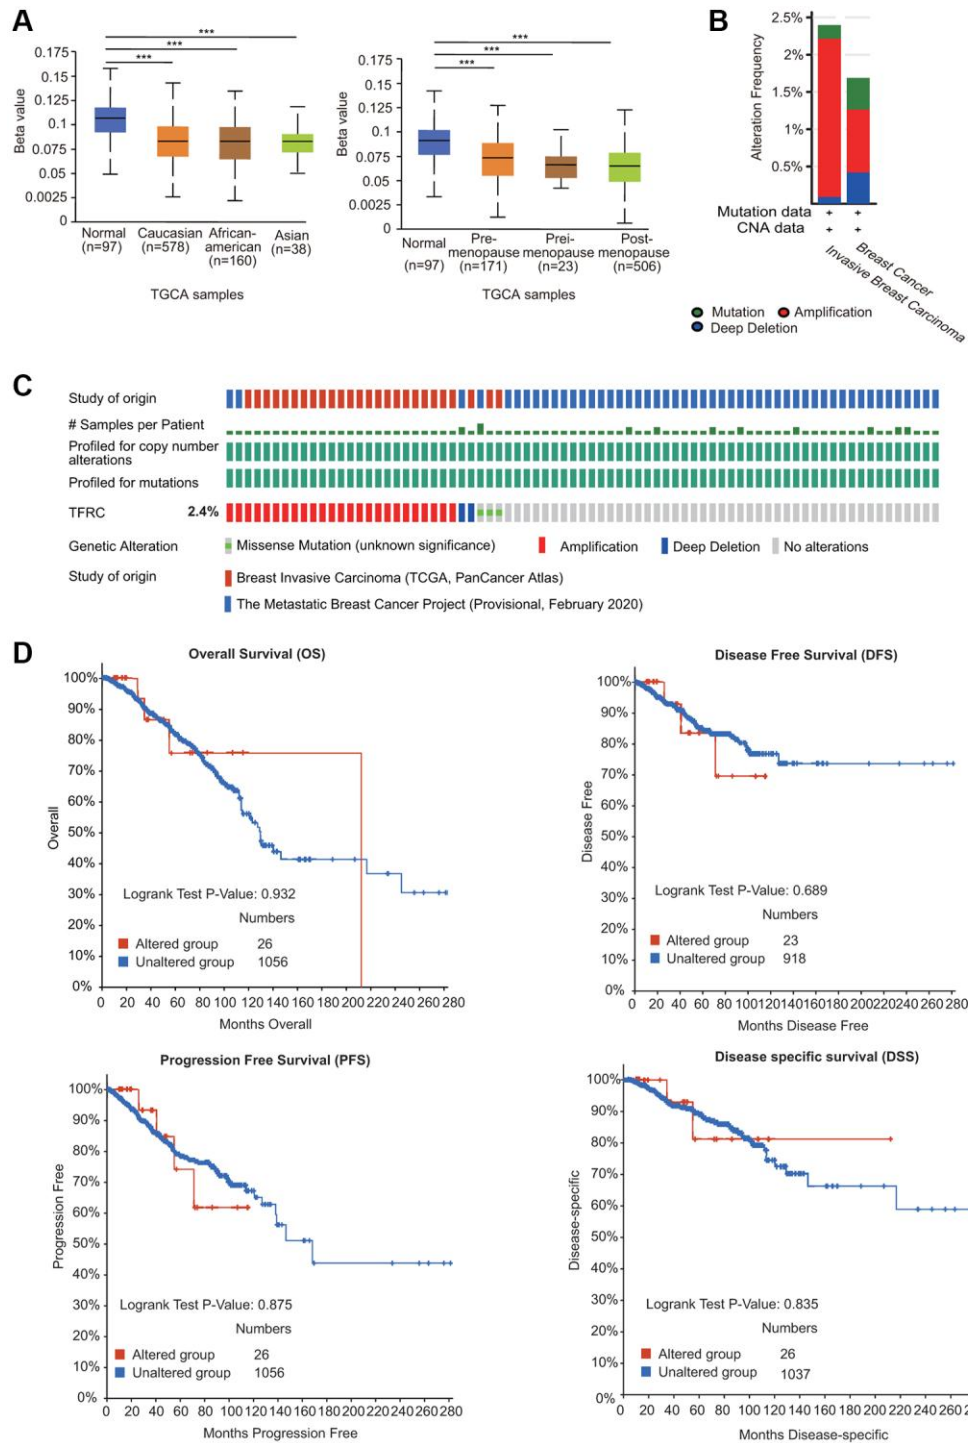

**Supplementary Figure 3.** (A) Association of DNA methylation of Tfr1 with clinicopathological parameters of BC patients. The DNA methylation of Tfr1 was investigated in patients of different races (normal individuals,  $n = 97$ ; Asian,  $n = 38$ ; African-American,  $n = 160$ ; and Caucasian,  $n = 578$ ) and different menopausal patients (normal individuals,  $n = 97$ ; premenopausal,  $n = 171$ ; perimenopausal,  $n = 23$ ; and postmenopausal,  $n = 506$ ). (B) Alteration frequency of Tfr1 in BC from the cBioPortal database. (C) Summary of changes in a query of Tfr1. (D) KM plots of OS, DFS, PFS and DSS in BC patients with or without gene alterations in Tfr1. \*  $< 0.05$ , \*\*  $< 0.01$ , \*\*\*  $< 0.001$ .

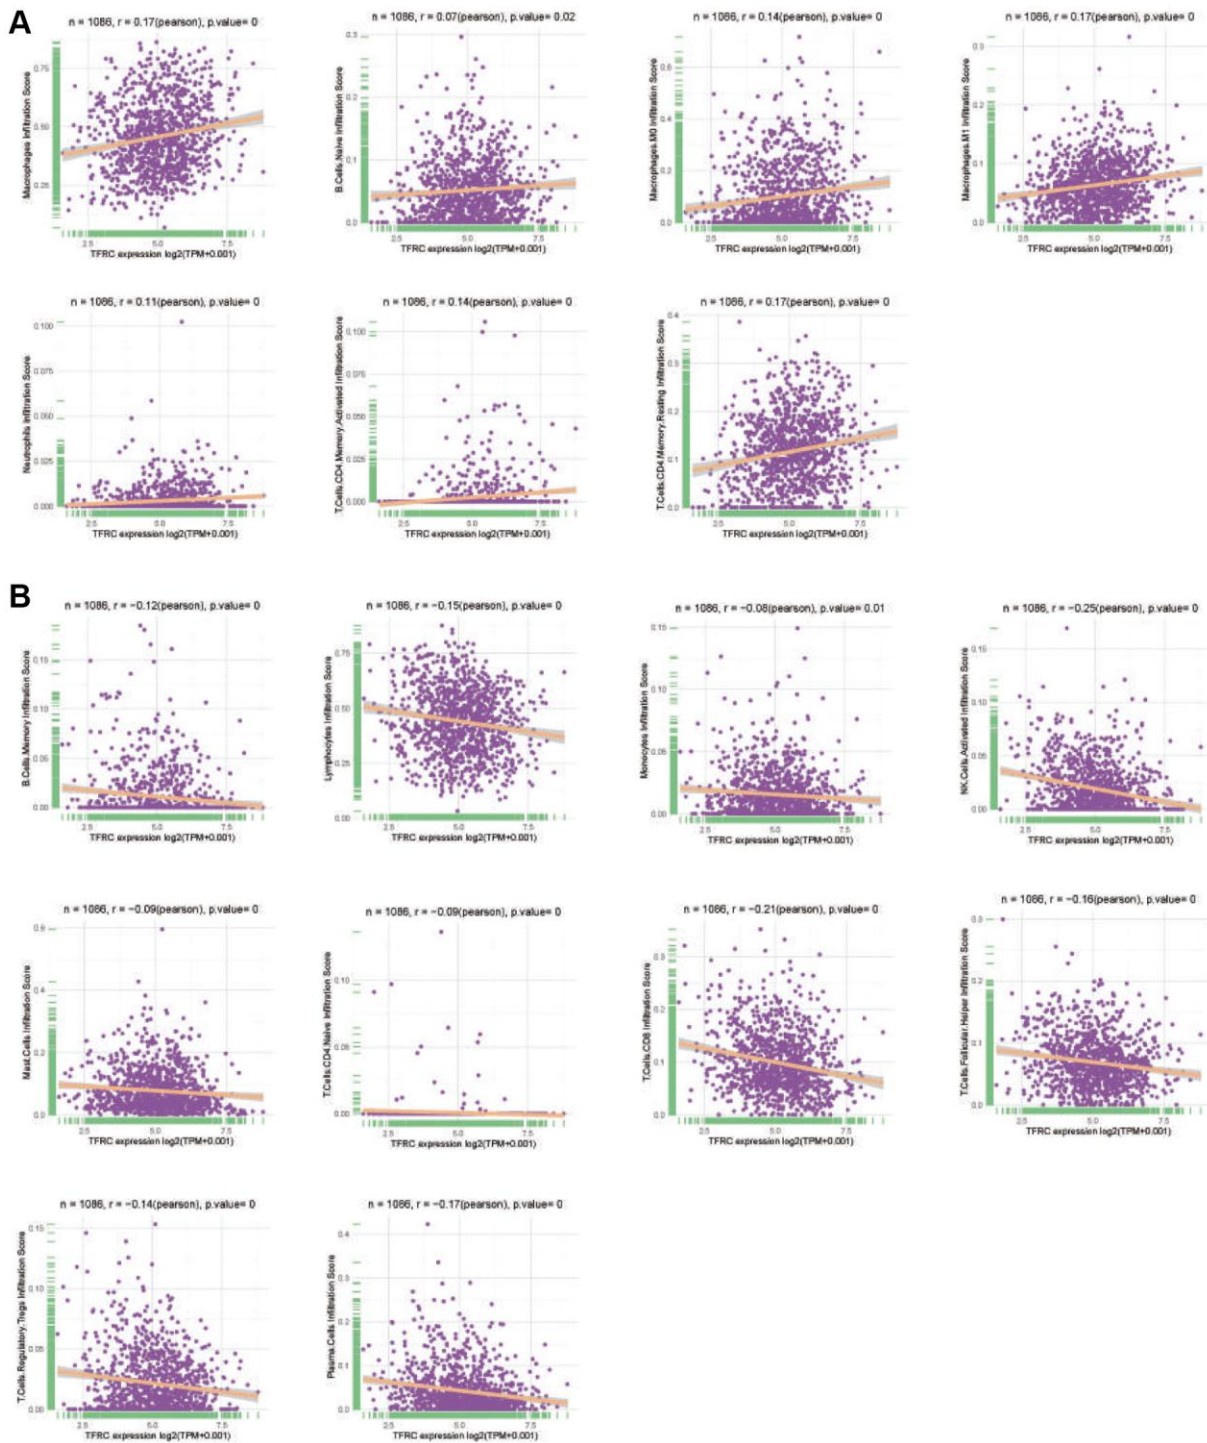

**Supplementary Figure 4.** (A, B) Scatterplots of positive or negative correlations between the expression of Tfr1 and infiltration scores of different immune cells in BC.

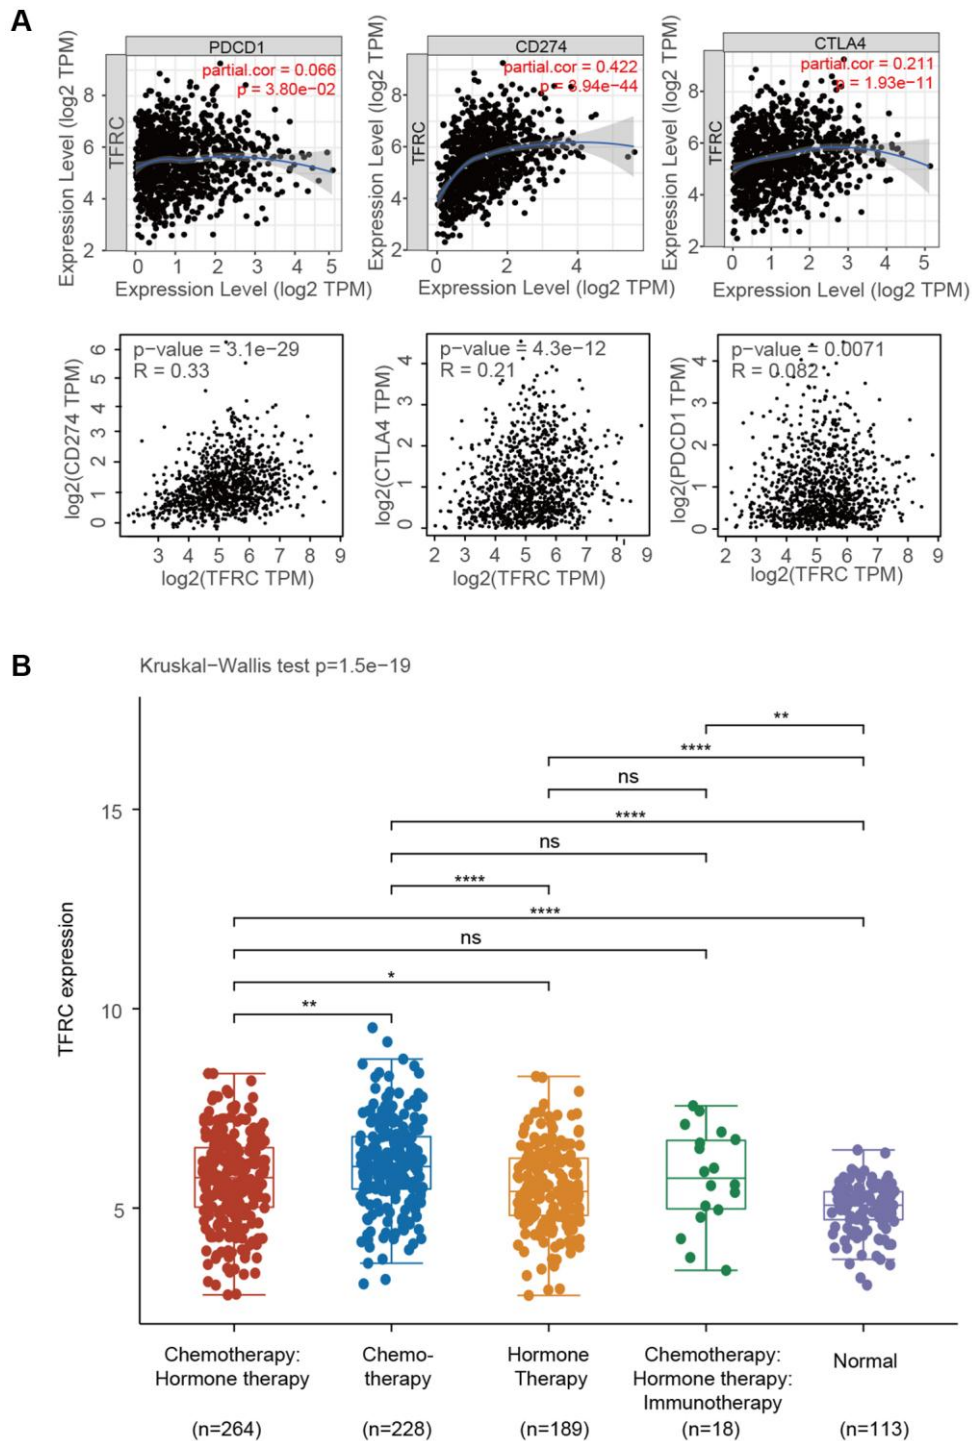

**Supplementary Figure 5.** (A) Correlations between Tfr1 and CTLA-4, PD-L1, and PD-1 expression in BC according to the TIMER (upper) and GEPIA (lower) databases. (B) Tfr1 expression in BC patients with different treatments was investigated based on the TCGA dataset using the R software package ggplot2 with the Kruskal-Wallis test. \* < 0.05, \*\* < 0.01, \*\*\* < 0.001, \*\*\*\* < 0.0001.
